# Supplementary material for: Simultaneous determination of chlorine and sulfur in geochemical reference samples by wavelength dispersive X-ray fluorescence spectrometry
Source: Royal Society of Chemistry journal article supplement (doi:10.1039/d0nj02042g), 2020-01-01
Supplement: d0nj02042g1.pdf [file d0nj02042g1.pdf]

## Supporting Information

### Simultaneous determination of chlorine and sulfur in geochemical reference samples by Wavelength Dispersive X-ray Fluorescence Spectrometry

Wen-Zhi Zhao \*, Bing Lu, Sheng-Nan Lv, Chuan-Fang Zhou, Yuan Yang

#### **Sample preparation for total sulphur determinations by ICP-OES**

0.2500g of the sample was placed in a 50mL Teflon beaker, 2.5 mL of nitric acid, 2.5 mL of hydrochloric acid, 5 mL of hydrofluoric acid, and 1 mL of perchloric acid were added. Close the lid, shake and leave it overnight. Place the beaker on a hot plate, remove the lid, rinse with a small amount of water, heat and decompose at 190 to 210 °C, and dry it until the white smoke is exhausted (If the sample is not completely decomposed, add nitric acid and hydrofluoric acid before evaporating to dry). 5mL of 50% hydrochloric acid was added and heated on a hot plate until the solid salts were completely dissolved. Remove the beaker for cooling, transfer the solution to a 25mL polyethylene colorimetric tube, Use pure water to make up the volume to 25mL, and measure after standing for 4h.

#### **Sample preparation for total sulphur determinations by combustion-IR detection**

0.4g of iron flux was placed in a porcelain crucible, 0.08 g of the sample was placed, cover the surface of the sample with 1.5g of tungsten flux. The crucible was placed on the crucible rack of the elemental infrared analyser. After the analysis heating was started, the sulfur release curve in the sample will be displayed in the data display area of the software.

**Table S1** Repeated determination results for Cl and S

| Reference samples | Elements | Reference value (mg/kg) | Repeat measured value (mg/kg) (n=10) |       |       |       |       |       |       |       |       |       |
|-------------------|----------|-------------------------|--------------------------------------|-------|-------|-------|-------|-------|-------|-------|-------|-------|
|                   |          |                         | 1                                    | 2     | 3     | 4     | 5     | 6     | 7     | 8     | 9     | 10    |
| GSD23             | Cl       | 46±8                    | 49.3                                 | 127.4 | 215.9 | 250.2 | 291.1 | 300.8 | 370.6 | 403.5 | 425.6 | 470.1 |
|                   | S        | 11700±900               | 11791                                | 11365 | 11880 | 11895 | 11350 | 11664 | 11843 | 11611 | 11622 | 11867 |
| GSD12             | Cl       | 163±25                  | 172.2                                | 206.6 | 217.9 | 245.1 | 274.0 | 299.7 | 340.0 | 373.9 | 390.5 | 433.7 |
|                   | S        | 940±54                  | 927.4                                | 938.0 | 943.3 | 989.9 | 935.6 | 942.4 | 915.5 | 944.5 | 926.5 | 968.1 |
| GSS33             | Cl       | 284±11                  | 291.7                                | 380.0 | 451.4 | 516.2 | 581.4 | 610.5 | 635.6 | 713.5 | 713.1 | 793.5 |
|                   | S        | 268±19                  | 263.3                                | 258.3 | 245.2 | 252.8 | 260.2 | 249.6 | 247.6 | 255.1 | 244.8 | 268.5 |
| GSS24             | Cl       | 4800±300                | 4967                                 | 4877  | 4973  | 4990  | 4996  | 4744  | 4975  | 5064  | 4997  | 4991  |
|                   | S        | 2000±300                | 2028                                 | 1942  | 1994  | 1986  | 1951  | 1879  | 2002  | 1989  | 1950  | 1978  |
| GSS23             | Cl       | 6300±600                | 6017                                 | 6200  | 6190  | 6214  | 6187  | 6166  | 6343  | 6180  | 6432  | 6177  |
|                   | S        | (420)                   | 408.9                                | 419.4 | 424.9 | 419.1 | 428.0 | 421.3 | 430.5 | 418.1 | 446.2 | 412.7 |

**Table S2** Analysis results of chlorine in reference samples by WD-XRF

| Analysis content                                  | Reference samples |       |       |       |       |       |        |        |       |        |
|---------------------------------------------------|-------------------|-------|-------|-------|-------|-------|--------|--------|-------|--------|
|                                                   | GSS32             | GSS2  | GSS34 | GSS33 | GSS23 | GSD12 | GSS24  | GSD28  | GSD21 | GSD23  |
| Concentrations determined of sulfur (mg/kg) (n=7) | 35.8              | 67.7  | 927.4 | 298.3 | 6426  | 175.0 | 4905   | 86.2   | 2875  | 40.9   |
|                                                   | 32.5              | 63.8  | 917.7 | 297.4 | 6214  | 184.9 | 4745   | 91.6   | 3031  | 40.7   |
|                                                   | 29.6              | 61.3  | 941.9 | 292.6 | 6425  | 186.8 | 4563   | 93.0   | 2850  | 42.5   |
|                                                   | 34.7              | 64.4  | 898.4 | 319.2 | 6489  | 186.8 | 4256   | 92.1   | 3138  | 40.5   |
|                                                   | 30.3              | 66.5  | 980.5 | 271.7 | 6804  | 178.6 | 4623   | 89.3   | 2963  | 40.5   |
|                                                   | 32.6              | 61.2  | 941.9 | 306.3 | 6993  | 160.4 | 4469   | 91.8   | 3250  | 42.7   |
|                                                   | 32.2              | 62.8  | 937.0 | 293.6 | 6426  | 168.5 | 4549   | 92.4   | 2988  | 46.7   |
| Average value (mg/kg)                             | 32.5              | 63.9  | 935.1 | 297.0 | 6540  | 177.3 | 4587   | 90.9   | 3013  | 42.1   |
| Reference value (mg/kg)                           | 34                | 62    | 906   | 284   | 6300  | 163   | 4800   | 99     | 2800  | 46     |
| Relative error (%)                                | -4.3              | 3.1   | 3.2   | 4.6   | 3.8   | 8.8   | -4.4   | -8.2   | 7.6   | -8.6   |
| Standard deviation (mg/kg)                        | 2                 | 2     | 25    | 14    | 266   | 10    | 205    | 2      | 142   | 2      |
| Relative standard deviation (RSD) (%)             | 6.8               | 3.9   | 2.7   | 4.9   | 4.1   | 5.7   | 4.5    | 2.6    | 4.7   | 5.3    |
| $\Delta \log C$                                   | -0.019            | 0.013 | 0.014 | 0.019 | 0.016 | 0.036 | -0.020 | -0.037 | 0.032 | -0.039 |

**Table S3** Analysis results of chlorine in reference samples by spectrophotometry

| Analysis content                                  | Reference samples |       |        |       |        |        |       |       |       |        |
|---------------------------------------------------|-------------------|-------|--------|-------|--------|--------|-------|-------|-------|--------|
|                                                   | GSS32             | GSS2  | GSS34  | GSS33 | GSS23  | GSD12  | GSS24 | GSD28 | GSD21 | GSD23  |
|                                                   | 29.1              | 60.5  | 948.6  | 279.9 | 5510   | 149.8  | 5168  | 110.3 | 2856  | 45.8   |
|                                                   | 33.5              | 64.1  | 831.0  | 310.5 | 6221   | 158.1  | 4844  | 101.8 | 3214  | 40.2   |
|                                                   | 30.7              | 71.2  | 843.5  | 278.1 | 6219   | 177.9  | 5419  | 108.6 | 3121  | 39.4   |
| Concentrations determined of sulfur (mg/kg) (n=7) | 33.4              | 61.7  | 911.1  | 306.3 | 5546   | 151.2  | 4123  | 91.0  | 2745  | 43.5   |
|                                                   | 32.6              | 68.7  | 893.6  | 271.8 | 6348   | 145.5  | 5512  | 99.1  | 2912  | 46.1   |
|                                                   | 37.0              | 58.1  | 861.0  | 300.9 | 6364   | 171.6  | 5100  | 99.6  | 2663  | 38.3   |
|                                                   | 32.8              | 61.7  | 843.5  | 293.4 | 5781   | 151.8  | 5092  | 109.7 | 3209  | 39.4   |
| Average value (mg/kg)                             | 32.7              | 63.7  | 876.1  | 291.6 | 5998   | 158.0  | 5037  | 102.9 | 2960  | 41.8   |
| Reference value (mg/kg)                           | 34                | 62    | 906    | 284   | 6300   | 163    | 4800  | 99    | 2800  | 46     |
| Relative error (%)                                | -3.7              | 2.8   | -3.3   | 2.7   | -4.8   | -3.1   | 4.9   | 3.9   | 5.7   | -9.1   |
| Standard deviation (mg/kg)                        | 2                 | 5     | 43     | 15    | 375    | 12     | 460   | 7     | 224   | 3      |
| Relative standard deviation (RSD) (%)             | 7.6               | 7.3   | 4.9    | 5.2   | 6.3    | 7.7    | 9.1   | 6.9   | 7.6   | 7.8    |
| $\Delta \log C$                                   | -0.017            | 0.012 | -0.015 | 0.011 | -0.021 | -0.014 | 0.021 | 0.017 | 0.024 | -0.041 |

**Table S4** Analysis results of sulfur in reference samples by WD-XRF

| Analysis content                                  | Reference samples |        |        |       |       |        |       |        |       |       |
|---------------------------------------------------|-------------------|--------|--------|-------|-------|--------|-------|--------|-------|-------|
|                                                   | GSS32             | GSS2   | GSS34  | GSS33 | GSS23 | GSD12  | GSS24 | GSD28  | GSD21 | GSD23 |
|                                                   | 73.1              | 208.5  | 416.5  | 269.7 | 439.1 | 918.1  | 2181  | 5213   | 7081  | 12611 |
|                                                   | 66.8              | 205.8  | 407.3  | 298.5 | 453.8 | 896.5  | 2218  | 5021   | 6915  | 12974 |
|                                                   | 75.0              | 197.2  | 408.9  | 298.8 | 431.7 | 901.8  | 1906  | 5305   | 7128  | 12650 |
| Concentrations determined of sulfur (mg/kg) (n=7) | 74.2              | 210.4  | 401.2  | 282.9 | 424.1 | 915.9  | 2117  | 5435   | 7732  | 12638 |
|                                                   | 70.5              | 202.7  | 389.1  | 291.0 | 445.5 | 916.0  | 1941  | 5547   | 7056  | 12391 |
|                                                   | 69.1              | 199.4  | 408.2  | 289.5 | 432.2 | 942.8  | 1956  | 4997   | 7155  | 12702 |
|                                                   | 69.3              | 196.0  | 417.8  | 278.1 | 456.3 | 899.7  | 2232  | 5208   | 7671  | 12357 |
| Average value (mg/kg)                             | 71.1              | 202.9  | 407.0  | 286.9 | 440.4 | 913.0  | 2079  | 5246   | 7248  | 12617 |
| Reference value (mg/kg)                           | 77                | 210    | 431    | 268   | 420   | 940    | 2000  | 5520   | 6700  | 11700 |
| Relative error (%)                                | -7.6              | -3.4   | -5.6   | 7.1   | 4.9   | -2.9   | 3.9   | -5.0   | 8.2   | 7.8   |
| Standard deviation (mg/kg)                        | 3                 | 6      | 10     | 11    | 12    | 16     | 141   | 202    | 319   | 206   |
| Relative standard deviation (RSD) (%)             | 4.3               | 2.8    | 2.4    | 3.7   | 2.7   | 1.7    | 6.7   | 3.8    | 4.4   | 1.6   |
| $\Delta \log C$                                   | -0.034            | -0.015 | -0.025 | 0.030 | 0.021 | -0.013 | 0.017 | -0.022 | 0.034 | 0.033 |

**Table S5** Analysis results of sulfur in reference samples by ICP-OES

| Analysis content                                  | Reference samples |       |        |        |       |       |        |        |        |       |
|---------------------------------------------------|-------------------|-------|--------|--------|-------|-------|--------|--------|--------|-------|
|                                                   | GSS32             | GSS2  | GSS34  | GSS33  | GSS23 | GSD12 | GSS24  | GSD28  | GSD21  | GSD23 |
|                                                   | 82.1              | 232.2 | 439.8  | 251.7  | 426.8 | 961.4 | 1867   | 5211   | 6311   | 12245 |
|                                                   | 83.6              | 236.8 | 396.3  | 246.0  | 427.3 | 969.2 | 1947   | 5369   | 6173   | 12081 |
|                                                   | 81.7              | 236.4 | 389.3  | 251.4  | 462.3 | 1017  | 1851   | 5267   | 6017   | 12149 |
| Concentrations determined of sulfur (mg/kg) (n=7) | 80.9              | 241.9 | 431.7  | 242.7  | 482.0 | 998.1 | 1927   | 5221   | 6304   | 11142 |
|                                                   | 81.8              | 238.5 | 420.8  | 245.4  | 474.0 | 1003  | 2032   | 5315   | 6251   | 12011 |
|                                                   | 79.9              | 238.3 | 395.5  | 258.3  | 489.3 | 995.2 | 2087   | 5296   | 6108   | 11537 |
|                                                   | 81.0              | 213.3 | 416.3  | 250.2  | 442.3 | 998.5 | 1942   | 5048   | 5966   | 13192 |
| Average value (mg/kg)                             | 81.6              | 233.9 | 412.8  | 249.4  | 457.7 | 991.8 | 1950   | 5247   | 6161   | 12051 |
| Reference value (mg/kg)                           | 77                | 210   | 431    | 268    | 420   | 940   | 2000   | 5520   | 6700   | 11700 |
| Relative error (%)                                | 5.9               | 11.4  | -4.2   | -6.9   | 9.0   | 5.5   | -2.5   | -5.0   | -8.0   | 3.0   |
| Standard deviation (mg/kg)                        | 1                 | 10    | 20     | 5      | 26    | 20    | 84     | 103    | 137    | 638   |
| Relative standard deviation (RSD) (%)             | 1.4               | 4.1   | 4.7    | 2.1    | 5.6   | 2.0   | 4.3    | 2.0    | 2.2    | 5.3   |
| $\Delta \log C$                                   | 0.025             | 0.047 | -0.019 | -0.031 | 0.037 | 0.023 | -0.011 | -0.022 | -0.036 | 0.013 |

**Table S6** Analysis results of sulfur in reference samples by combustion-IR detection

| Analysis content                                  | Reference samples |       |       |        |        |       |        |        |        |        |
|---------------------------------------------------|-------------------|-------|-------|--------|--------|-------|--------|--------|--------|--------|
|                                                   | GSS32             | GSS2  | GSS34 | GSS33  | GSS23  | GSD12 | GSS24  | GSD28  | GSD21  | GSD23  |
| Concentrations determined of sulfur (mg/kg) (n=7) | 88.9              | 209.3 | 403.2 | 251.7  | 435.8  | 996.1 | 1767   | 4986   | 6150   | 11145  |
|                                                   | 72.1              | 239.5 | 472.4 | 236.9  | 415.6  | 1028  | 1930   | 5144   | 7145   | 10899  |
|                                                   | 73.5              | 239.4 | 466.7 | 231.6  | 426.4  | 987.2 | 1856   | 5321   | 5899   | 11062  |
|                                                   | 80.2              | 218.7 | 444.7 | 277.8  | 375.8  | 894.2 | 2211   | 5747   | 7125   | 11754  |
|                                                   | 75.7              | 218.1 | 408.7 | 270.9  | 373.2  | 1025  | 1935   | 5661   | 5986   | 9684   |
|                                                   | 77.3              | 248.7 | 469.1 | 265.8  | 361.9  | 984.1 | 1988   | 5277   | 6678   | 9927   |
|                                                   | 91.2              | 245.4 | 481.7 | 255.6  | 439.8  | 1021  | 1921   | 4897   | 6211   | 9788   |
| Average value (mg/kg)                             | 79.8              | 231.3 | 449.5 | 255.8  | 404.1  | 990.8 | 1944   | 5290   | 6456   | 10608  |
| Reference value (mg/kg)                           | 77                | 210   | 431   | 268    | 420    | 940   | 2000   | 5520   | 6700   | 11700  |
| Relative error (%)                                | 3.7               | 10.1  | 4.3   | -4.6   | -3.8   | 5.4   | -2.8   | -4.2   | -3.6   | -9.3   |
| Standard deviation (mg/kg)                        | 7                 | 16    | 32    | 17     | 33     | 46    | 137    | 320    | 525    | 805    |
| Relative standard deviation (RSD) (%)             | 9.4               | 6.7   | 7.1   | 6.7    | 8.1    | 4.7   | 7.1    | 6.1    | 8.1    | 7.6    |
| $\Delta \log C$                                   | 0.016             | 0.042 | 0.018 | -0.020 | -0.017 | 0.023 | -0.012 | -0.018 | -0.016 | -0.043 |

**Table S7** The description of the reference samples

| Reference samples | category           | Sampling area                                                              | Cl content (mg/kg) | S content (mg/kg) |
|-------------------|--------------------|----------------------------------------------------------------------------|--------------------|-------------------|
| GSS2              | Soil               | Chestnut soil in siziwang banner inner mongolia, China                     | 62±10              | 210±43            |
| GSS3              | Soil               | Yellow brown soil, ye county, shandong province, China                     | 57±11              | 123±14            |
| GSS7              | Soil               | Basalt red soil in xuwen, guangdong province, China                        | 100±6              | 250±36            |
| GSS9              | Soil               | Hongze lake deposits, China                                                | 45±9               | 241±22            |
| GSS14             | Soil               | Sichuan basin, China                                                       | 50±4               | 173±21            |
| GSS17             | Soil               | Sandy soil in wulatehou banner, inner mongolia, China                      | 38±6               | 108±14            |
| GSS18             | Soil               | Saline-alkaline soil in hangjinhou banner, inner mongolia, China           | 7800±500           | 7000              |
| GSS19             | Soil               | Brown desert soil in haiyan county, qinghai province, China                | 758±78             | 816               |
| GSS20             | Soil               | Lushan saline-alkali soil, xinjiang province, China                        | 40000±3000         | 27000±2900        |
| GSS21             | Soil               | Grey calcareous soil in shihezi, xinjiang province, China                  | 152±12             | 167               |
| GSS22             | Soil               | Sediment of yellow beach in rizhao city, shandong province, China          | 5100±300           | 440±42            |
| GSS23             | Soil               | Sediments on the beach of xiangshan, zhejiang province, China              | 6300±600           | 420               |
| GSS24             | Soil               | Sediment from the south beach of yangjiang city, guangdong province, China | 4800±300           | 2000±300          |
| GSS26             | Soil               | Wuhe huaihe sediments, anhui province, China                               | 75±9               | 162±10            |
| GSS28             | Soil               | Sediment of xiangjiang river, yiyang city, hunan province, China           | 41±6               | 281±21            |
| GSS31             | Soil               | Hanshui river basin, hanchuan city, hubei province, China                  | 65±5               | 180±8             |
| GSS32             | Soil               | Huaihe river basin, chuzhou city, anhui province, China                    | 34±4               | 77±9              |
| GSS33             | Soil               | Yellow river basin, binzhou city, shandong province, China                 | 284±11             | 268±19            |
| GSS34             | Soil               | Haihe river basin, tanggu district, tianjin, China                         | 906±33             | 431±22            |
| GSD12             | Stream<br>Sediment | Yangchun polymetallic mining area, guangdong province, China               | 163±25             | 940±54            |
| GSD16             | Stream<br>Sediment | Langshan metamorphic rock area, inner mongolia, China                      | 33±3               | 87±10             |
| GSD18             | Stream<br>Sediment | Mudanjiang granite district, heilongjiang province, China                  | 30                 | 66±10             |
| GSD21             | Stream<br>Sediment | Copper mining area, xinjiang province, China                               | 2800±200           | 6700±600          |
| GSD22             | Stream<br>Sediment | North slope of tianshan mountain, xinjiang province, China                 | 298±39             | 6200              |
| GSD23             | Stream<br>Sediment | Polymetallic mining area, dexing city, jiangsu province, China             | 46±8               | 11700±900         |
| GSD27             | Stream<br>Sediment | Copper mining area, tibet autonomous region, China                         | 476±22             | 1060±60           |
| GSD28             | Stream<br>Sediment | Lead and zinc mine in lanping county, yunnan province, China               | 99±7               | 5520±170          |
